# Supplementary material for: Dapagliflozin alleviates renal fibrosis in a mouse model of adenine-induced renal injury by inhibiting TGF-β1/MAPK mediated mitochondrial damage
Source: PubMed Central journal article supplement (PMC10028454; doi:10.3389/fphar.2023.1095487), 2023-03-07
Supplement: Image2.pdf [file Image2.pdf]

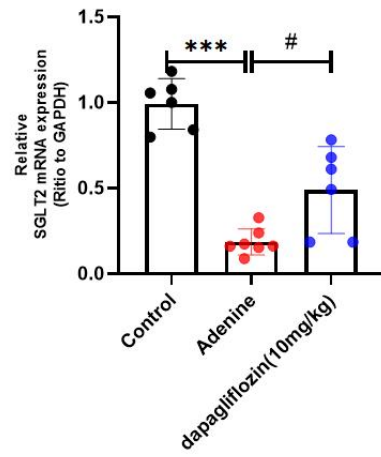

Supplementary Figure S2. Effect of dapagliflozin on SGLT2 in renal tissue of 0.2% adenine-fed mice. The level of SGLT2 mRNA in the kidneys of 0.2% adenine-fed mice decreased, and increased after treatment with dapagliflozin
