# Supplementary material for: Dapagliflozin alleviates renal fibrosis in a mouse model of adenine-induced renal injury by inhibiting TGF-β1/MAPK mediated mitochondrial damage
Source: PubMed Central journal article supplement (PMC10028454; doi:10.3389/fphar.2023.1095487), 2023-03-07
Supplement: Table1.pdf [file Table1.pdf]

Supplementary Table S1: List of mice primers used for real time PCR

| <b>Genes</b>       | <b>sequences</b>                |                                |
|--------------------|---------------------------------|--------------------------------|
| Col1a1(m)          | F:5-agacatgttcagctttgtggac-3    | R:5-gcagctgacttcagggatg-3      |
| Col1a3(m)          | F:5-aggcaacagtggttctcctg-3      | R:5-gacctcgtgctccagttagc-3     |
| FN(m)              | F:5-cgtaaattgccccattgagtg-3     | R:5-gagggctgctaacaactcag-3     |
| Vimentin(m)        | F:5-ctctctgaggctgctaaccg-3      | R:5-gagcaatcctgctctcctcg-3     |
| $\alpha$ -SMA (m)  | F:5-gtcccagacatcaggagtaa-3      | R:5-tcggatacttcagcgtcagga-3    |
| Mmp7(m)            | F:5-ctgccactgtcccaggaag-3       | R:5-gggagagttttcagtcagtg-3     |
| ND1(m)             | F:5-cacccccttatcaacctcaa-3      | R:5-attgtttctgcgaggggtg-3      |
| ND4(m)             | F:5-attattattaccgatgaggggaacc-3 | R:5-attaagatgagggcaattagcagt-3 |
| AKGDH(m)           | F:5-gtttcttcaaactggtggttct-3    | R:5-gcatgattccaggggttctcaa-3   |
| PDH(m)             | F:5-gaaatgtgacctcatcggt-3       | R:5-tgatccgccttagctccatc-3     |
| CPT1(m)            | F:5-ggtcttctcgggtcgaaagc-3      | R:5-tcctcccaccagtactcac-3      |
| PPAR- $\alpha$     | F:5-ttgccaaggctatcccagg-3       | R:5-gtcagaacggcttctca-3        |
| Acox1 (m)          | F:5-cttgatggtagtcggaga-3        | R:5-tggcttcgagtgaggaagt-3      |
| Acox2(m)           | F:5-tcatccaactgaccagtg-3        | R:5-cagcaaggactctgtcagca-3     |
| IL1- $\beta$ (m)   | F:5-aaggagaaccaagcaacgac-3      | R:5-aactgcagactcaaactccac-3    |
| IL-6(m)            | F:5-agttgccttctgggactga-3       | R:5-tccacgatttccagagaac-3      |
| TNF- $\alpha$ (m)  | F:5-caggcggcctatgtctc-3         | R:5-cgatcaccgaagttcagtag-3     |
| Mcp-1(m)           | F:5-taaaaactggatcggaacaaa-3     | R:5-gcattagctcagattacgggt-3    |
| Cxcl-1(m)          | F:5-ggcagggattcactcaaga-3       | R:5-actggggacacccttagc-3       |
| Sglt2(m)           | F:5-ttgggtggtgcttggtctat-3      | R:5-atgttgctggcgaacagaga-3     |
| TGF- $\beta$ 1 (m) | F:5-ctcccgtggcttctagtgc-3       | R:5-gccttagttggacaggatctg-3    |
| GAPDH(m)           | F:5-catggccttccgtgttcta-3       | R:5-cctcttcaccaccttctgat-3     |
